# Supplementary material
Source: PubMed Central journal article supplement (PMC5724000)
Supplement: 10.1074_M117.811323_jbc.M117.811323-1.pdf [file 10.1074_M117.811323_jbc.M117.811323-1.pdf]

Supplement to:  
**Proteolysis suppresses spontaneous prion generation in yeast**  
by  
Atsushi Okamoto, Nao Hosoda, Anri Tanaka, Gary P. Newnam,  
Yury O. Chernoff and Shin-ichi Hoshino

Supplemental Fig. S1

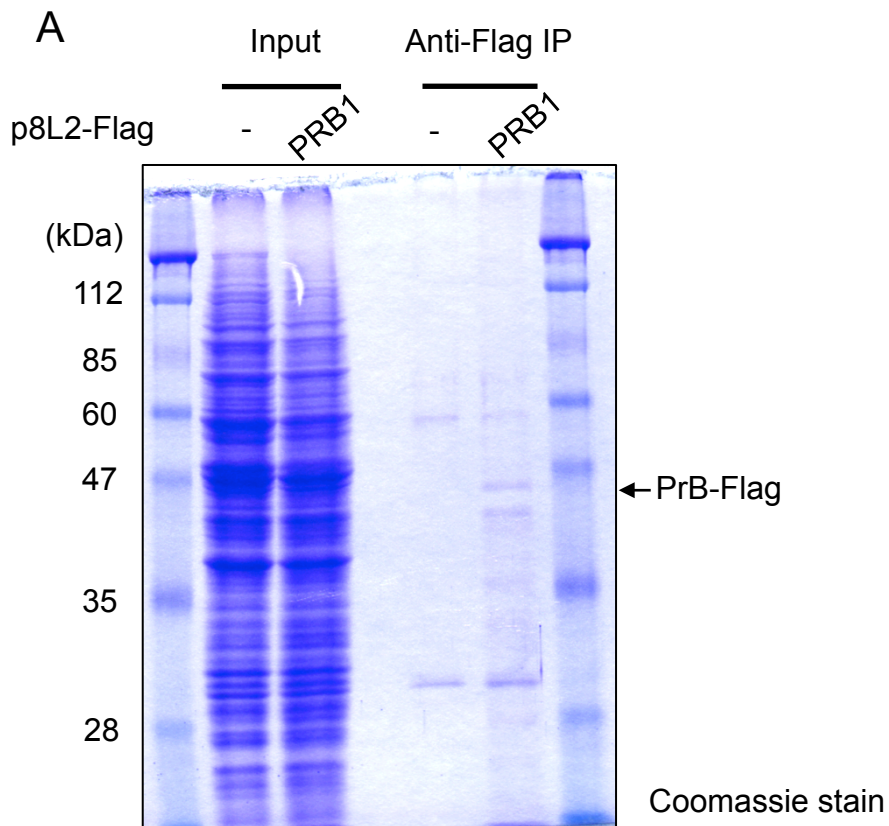

**FIGURE S1 The anti-Flag immunopurified PrB. (A)** PrB was purified from the cell extract isolated from *pep4Δ* strain carrying a PRB1-Flag single copy plasmid. Input and IP fractions were separated by SDS-PAGE followed by Coomassie brilliant blue staining.

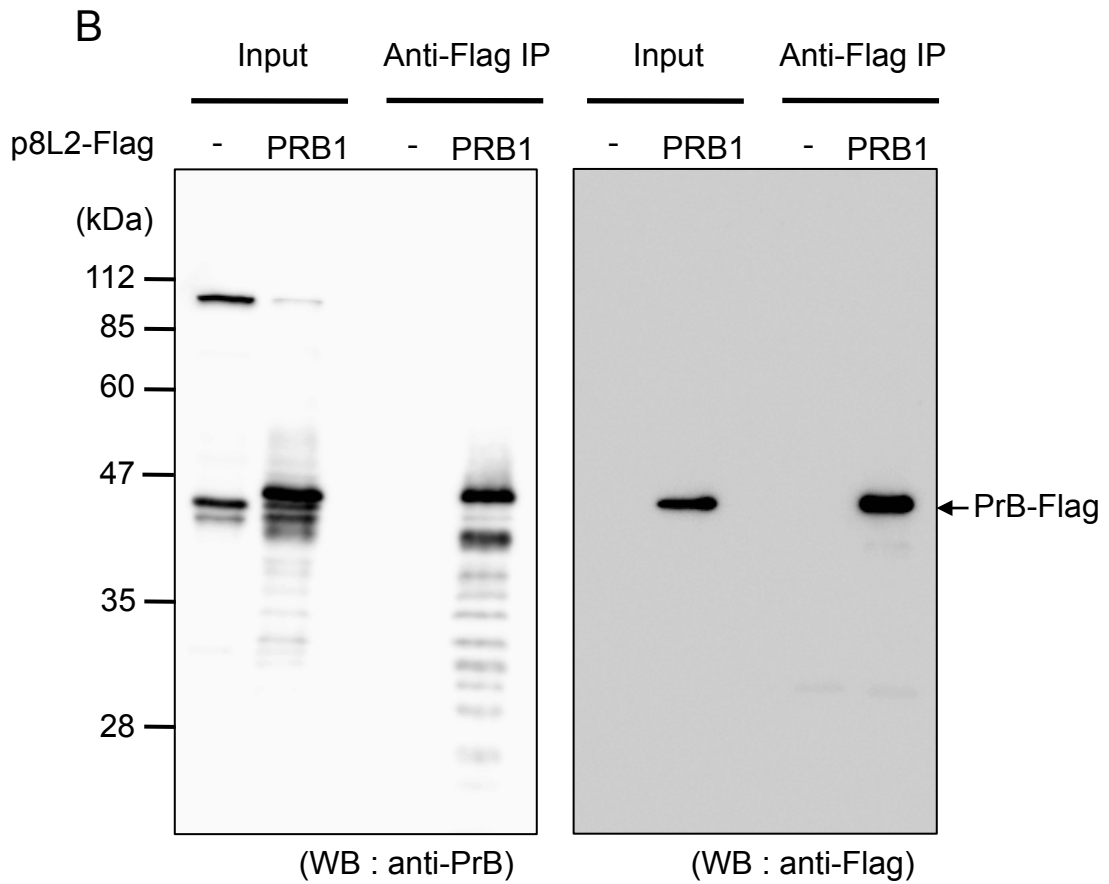

**FIGURE S1 The anti-Flag immunopurified PrB.**

**(B)** Input and IP fractions in (A) were analyzed by western blotting using anti-PrB or anti-Flag.

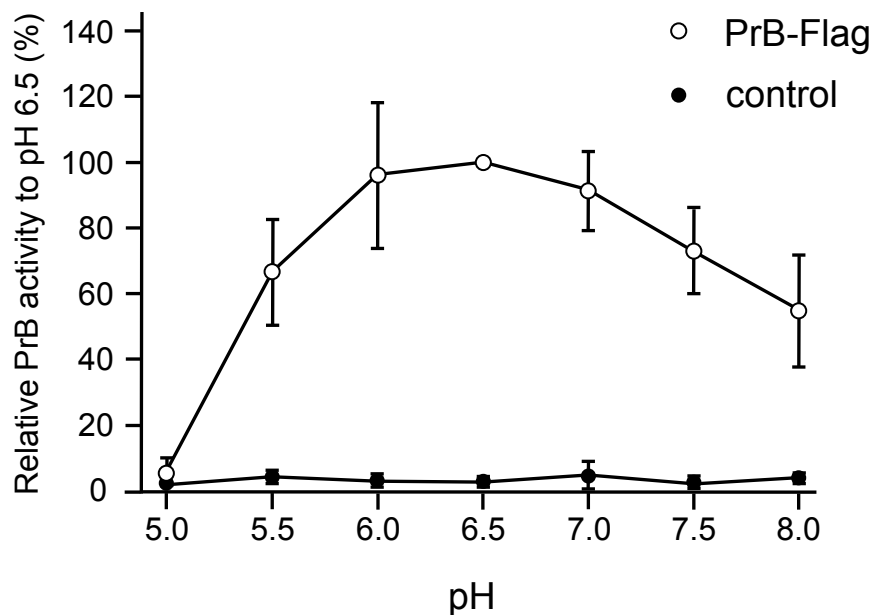

**FIGURE S2 The optimal pH for the purified PrB was around pH 6.5.** The activity of purified PrB between pH 5.0 and 8.0 was measured by azocoll assay. Relative PrB activity is expressed as a percentage of the maximum activity at pH 6.5 (n=3; bars, s.d.).

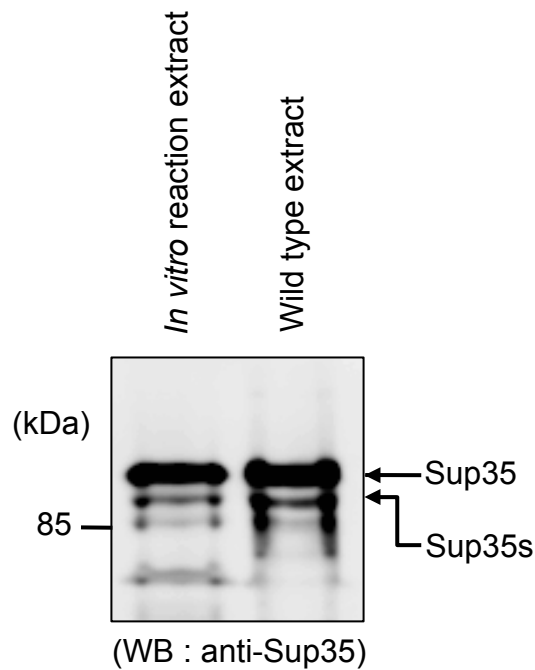

**FIGURE S3 The molecular weight of the cleaved Sup35 *in vitro* corresponds to Sup35s *in vivo*.** After *in vitro* Sup35 cleavage reaction at 30°C for 15 min (as in Fig. 3B), an aliquot of the reaction mixture was analyzed by western blotting using anti-Sup35 to compare the *in vitro* cleaved Sup35 with Sup35s in the lysate of wild type strain.

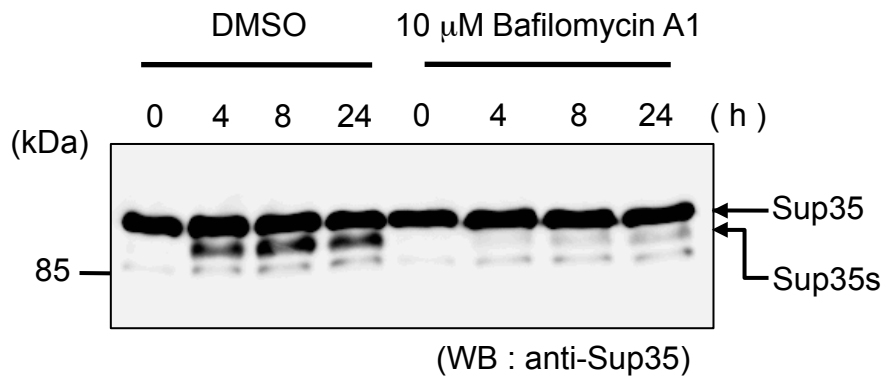

**FIGURE S4 Bafilomycin A1 inhibited the glucose-induced appearance of Sup35s.** Glucose-starved GT17 [*psi<sup>-</sup> pin<sup>-</sup>*] cells were cultured in YPDA containing either 10 mM bafilomycin A1 or its vehicle control. Cells were harvested at the specified time points and analyzed by western blotting using anti-Sup35.

## Yeast strains constructed in this study

| Strain | Genotypic background | Genotype                                                                                               |
|--------|----------------------|--------------------------------------------------------------------------------------------------------|
| GT17   | 74-D694              | <i>MATa ade1-14 his3 leu2 trp1 ura3 [psi<sup>-</sup>,pin<sup>-</sup>]</i>                              |
| OT60   | 74-D694              | <i>MATa ade1-14 his3 leu2 trp1 ura3 [psi<sup>-</sup>,PIN<sup>+</sup>]</i>                              |
| OT55   | 74-D694              | <i>MATa ade1-14 his3 leu2 trp1 ura3 [PSI<sup>+</sup>,PIN<sup>+</sup>]</i> weak                         |
| OT56   | 74-D694              | <i>MATa ade1-14 his3 leu2 trp1 ura3 [PSI<sup>+</sup>,PIN<sup>+</sup>]</i> strong                       |
| BY4741 |                      | <i>MATa his3Δ1 leu2Δ0 lysΔ0 ura3Δ0</i>                                                                 |
| yKO1   | BY4741               | <i>MATa his3Δ1 leu2Δ0 lysΔ0 ura3Δ0 nma111Δ::kanMX4</i>                                                 |
| yKO2   | BY4741               | <i>MATa his3Δ1 leu2Δ0 lysΔ0 ura3Δ0 imp2Δ::kanMX4</i>                                                   |
| yKO4   | BY4741               | <i>MATa his3Δ1 leu2Δ0 lysΔ0 ura3Δ0 ste13Δ::kanMX4</i>                                                  |
| yKO5   | BY4741               | <i>MATa his3Δ1 leu2Δ0 lysΔ0 ura3Δ0 prb1Δ::kanMX4</i>                                                   |
| yKO8   | BY4741               | <i>MATa his3Δ1 leu2Δ0 lysΔ0 ura3Δ0 pcp1Δ::kanMX4</i>                                                   |
| yKO14  | BY4741               | <i>MATa his3Δ1 leu2Δ0 lysΔ0 ura3Δ0 pep4Δ::kanMX4</i>                                                   |
| yKO15  | BY4741               | <i>MATa his3Δ1 leu2Δ0 lysΔ0 ura3Δ0 prc1Δ::kanMX4</i>                                                   |
| yAO53  | OT60                 | <i>MATa ade1-14 his3 leu2 trp1 ura3 sup35Δ::CgHIS3 YCplac22-SUP35-HA (WT)</i>                          |
| yAO66  | OT60                 | <i>MATa ade1-14 his3 leu2 trp1 ura3 [psi<sup>-</sup>,PIN<sup>+</sup>] prb1Δ::CgHIS3</i>                |
| yAO90  | OT60                 | <i>MATa ade1-14 his3 leu2 trp1 ura3 [psi<sup>-</sup>,PIN<sup>+</sup>] YCplac22</i>                     |
| yAO91  | OT60                 | <i>MATa ade1-14 his3 leu2 trp1 ura3 [psi<sup>-</sup>,PIN<sup>+</sup>] YCplac22-Myc-Ub-SUP35 (1M)</i>   |
| yAO92  | OT60                 | <i>MATa ade1-14 his3 leu2 trp1 ura3 [psi<sup>-</sup>,PIN<sup>+</sup>] YCplac22-Myc-Ub-SUP35 (39A)</i>  |
| yAO121 | OT60                 | <i>MATa ade1-14 his3 leu2 trp1 ura3 [psi<sup>-</sup>,PIN<sup>+</sup>] pep4Δ::CgHIS3</i>                |
| yAO109 | OT60                 | <i>MATa ade1-14 his3 leu2 trp1 ura3 [psi<sup>-</sup>,PIN<sup>+</sup>] p8L2-Flag</i>                    |
| yAO110 | OT60                 | <i>MATa ade1-14 his3 leu2 trp1 ura3 [psi<sup>-</sup>,PIN<sup>+</sup>] p8L2-PRB1</i>                    |
| yAO117 | OT55                 | <i>MATa ade1-14 his3 leu2 trp1 ura3 [PSI<sup>+</sup>,PIN<sup>+</sup>]</i> weak p8L2-Flag               |
| yAO118 | OT55                 | <i>MATa ade1-14 his3 leu2 trp1 ura3 [PSI<sup>+</sup>,PIN<sup>+</sup>]</i> weak p8L2-PRB1               |
| yAO119 | OT56                 | <i>MATa ade1-14 his3 leu2 trp1 ura3 [PSI<sup>+</sup>,PIN<sup>+</sup>]</i> strong p8L2-Flag             |
| yAO120 | OT56                 | <i>MATa ade1-14 his3 leu2 trp1 ura3 [PSI<sup>+</sup>,PIN<sup>+</sup>]</i> strong p8L2-PRB1             |
| yAO149 | GT17                 | <i>MATa ade1-14 his3 leu2 trp1 ura3 [psi<sup>-</sup>,pin<sup>-</sup>] YCplac22-SUP35-Flag</i>          |
| yAO150 | GT17                 | <i>MATa ade1-14 his3 leu2 trp1 ura3 [psi<sup>-</sup>,pin<sup>-</sup>] YCplac22-Flag-SUP35</i>          |
| yAO179 | OT60                 | <i>MATa ade1-14 his3 leu2 trp1 ura3 [psi<sup>-</sup>,PIN<sup>+</sup>] prc1Δ::CgHIS3</i>                |
| yAO226 | OT60                 | <i>MATa ade1-14 his3 leu2 trp1 ura3 [psi<sup>-</sup>,PIN<sup>+</sup>] pep4Δ::CgHIS3 p8L2-Flag</i>      |
| yAO227 | OT60                 | <i>MATa ade1-14 his3 leu2 trp1 ura3 [psi<sup>-</sup>,PIN<sup>+</sup>] pep4Δ::CgHIS3 p8L2-PRB1-Flag</i> |

Table S1. Yeast strains used in this study.

## Oligonucleotide primers used in this study

| Primer | Sequence 5' – 3'                                                                                 |
|--------|--------------------------------------------------------------------------------------------------|
| AO0009 | TCT TCA TCG ACT TGC TCG GAA TAA CAT CTA TAT CTG CCC ACT AGC AAC ATC GAG GTC<br>GAC GGT ATC GAT   |
| AO0010 | CGG TAT TAT TGT GTT TGC ATT TAC TTA TGT TTG CAA GAA ATT TAC TCG GCC CGC TCT<br>AGA ACT AGT GGA T |
| AO0015 | TCC TCG GAT TCA AAC CAA GGC AAC AAT CAG                                                          |
| AO0016 | TCC CAT TGT TGC TAG TGG GCA GAT ATA GAT                                                          |
| AO0018 | ATG GCA GGA TCC CAG AAG CTG ATC TCA GAG                                                          |
| AO0019 | GAA GGG GGA TCC ACC ACC ACG AAG TCT CAA                                                          |
| AO0020 | ACC ACC ACG AAG TCT CAA CAC AAG ATG AAG                                                          |
| AO0022 | GCC CAA CCT GCA GGT GGG TAC TAC CAA AAT                                                          |
| AO0025 | ATG TCG GAT TCA AAC CAA GGC AAC AAT CAG                                                          |
| AO0036 | GGA GTT CTT CCC ATA CAA ACT TAA GAG TCC AAT TAG CTT CAT CGC TCG AGG TCG ACG<br>GTA TCG AT        |
| AO0037 | GAT AGT GAA GAG GGA CTC CGA CTT GTA ACC TCG AGA CGC CTA AGG CCG CTC TAG AAC<br>TAG TGG AT        |
| AO0051 | TAA CAA GGA TCC ATG AAG TTA GAA AAT ACT CTA                                                      |
| AO0052 | CTA AAT GGA TCC TTA AAT AAT ATT CAA TTT ATC                                                      |
| AO0069 | GTG ACC TAG TAT TTA ATC CAA ATA AAA TTC AAA CAA AAA CCA AAA CTA ACT CGA GGT<br>CGA CGG TAT CGA T |
| AO0070 | CTC TCT AGA TGG CAG AAA AGG ATA GGG CGG AGA AGT AAG AAA AGT TTA GCC CGC TCT<br>AGA ACT AGT GGA T |
| AO0073 | AAG TTA GAA AAT ACT CTA TTT ACA CTC GGT GCC CTA                                                  |
| AO0074 | CAT GGT GGC AAT TTA GTG TGT GTA TTT GTG TTT GCG                                                  |
| AO0080 | GAC GAC GAT AAG TAA ATT TCT TGC AAA CAT AAG TAA ATG C                                            |
| AO0081 | ATC CTT GTA ATC CTC GGC AAT TTT AAC AAT TTT ACC AAT TGC                                          |
| AO0082 | GAC GAC GAT AAG TCG GAT TCA AAC CAA GGC AAC AAT CAG C                                            |
| AO0083 | ATC CTT GTA ATC CAT TGT TGC TAG TGG GCA GAT ATA GAT G                                            |
| AO0086 | CAC GGA TCC GCC ACC ATG GAT TAC                                                                  |
| AO0087 | AGC GGA TCC AAT CAA TGA ATC GAA AAT G                                                            |
| AO0119 | GACGACGATAAGTAAGGATCCGTGAATTTACTTTAAATCTTGC                                                      |
| AO0120 | ATCCTTGTAATCAATAATATTCAATTTATCAAGAATATCTCTC                                                      |
| NH0206 | ATG GAT TAC AAG GAT GAC GAC GAT AAG CAA AAG ATC ACC ACT GCT TCC                                  |
| NH0207 | GGT GGC AAT TTA GTG TGT GTA TTT G                                                                |
| NH0209 | CCA AGA TCT GTG AAT TTA CTT AAA ATC                                                              |
| NH0210 | AGC CTG CAG AAT CAA TGA ATC GAA AAT G                                                            |
| FN01   | CCA GAC TAC GCT TAA ATT TCT TGC AAA CAT AAG TAA ATG                                              |
| FN02   | GAC GTC GTA TGG GTA CTC GGC AAT TTT AAC AAT TTT ACC                                              |

Table S2. Oligonucleotide primers used in this study.

|               |                      | Ade+ | Cured | Cured rate (%) |
|---------------|----------------------|------|-------|----------------|
| Fig. 5B       | Early (growth phase) | 26   | 20    | 77             |
|               | Late (growth phase)  | 32   | 20    | 63             |
| Fig. 5D,5F,5H | Wild type            | 55   | 38    | 69             |
|               | <i>pep4Δ</i>         | 62   | 50    | 81             |
|               | <i>prb1Δ</i>         | 42   | 36    | 86             |
|               | <i>prc1Δ</i>         | 68   | 42    | 62             |
| Fig. 5J       | vector               | 48   | 37    | 71             |
|               | <i>PRB1</i>          | 58   | 37    | 68             |
| Fig. 6C       | vector               | 76   | 46    | 61             |
|               | 1M                   | 66   | 60    | 91             |
|               | 39A                  | 67   | 45    | 67             |

Table S3. **Guanidine curability of all strains used in this study.** Guanidine curability of all strains is shown.



| Mitotic stability (%)                         |             |         |
|-----------------------------------------------|-------------|---------|
| [ <i>psi</i> ]                                | vector      | 70 ± 5  |
|                                               | <i>PRB1</i> | 75 ± 4  |
| [ <i>PSI</i> <sup>+</sup> ] <sup>weak</sup>   | vector      | 79 ± 3  |
|                                               | <i>PRB1</i> | 74 ± 8  |
| [ <i>PSI</i> <sup>+</sup> ] <sup>strong</sup> | vector      | 60 ± 1  |
|                                               | <i>PRB1</i> | 79 ± 13 |

Table S4. **Mitotic stability of plasmids used in Fig. 7D.** Mitotic stability of strains used in Fig. 7D is shown. Average results of 3 repeats are shown, with standard deviations.
